# Supplementary material for: Active surveillance of metastatic renal cell carcinoma: Results from a prospective observational study (MaRCC)
Source: PubMed Central journal article supplement — Cancer. 2021 Mar 25;127(13):2204–12. doi: 10.1002/cncr.33494 (PMC8251950; doi:10.1002/cncr.33494), 2021-03-25
Supplement: CNCR-127-2204-s001.pdf [file CNCR-127-2204-s001.pdf]

# Fig. S1 Physician Treatment Selection Assessment Survey

(a)

## PHYSICIAN TREATMENT SELECTION ASSESSMENT SURVEY NEW SYSTEMIC THERAPY

|                           |                      |                                             |
|---------------------------|----------------------|---------------------------------------------|
| Site Number: _____        | Provider Name: _____ | Date of Visit: ____/____/____<br>DD MM YYYY |
| 8-digit Subject ID: _____ | Subject Name: _____  |                                             |
| Prescribed Therapy: _____ |                      |                                             |

### SECTION A: NO SYSTEMIC THERAPY SELECTED FOR THE PATIENT

Please select the **primary** reason and up to **two (2) secondary** reasons for NOT initiating therapy.

| Primary Reason (SELECT ONE)                                                                                                                                                                                                                                                                                                                                                                                                                                                                                                              | Secondary Reason (OPTIONAL)                                                                                                                                                                                                                                                                                                                                                                                                                                                                                                              | Secondary Reason (OPTIONAL)                                                                                                                                                                                                                                                                                                                                                                                                                                                                                                              |
|------------------------------------------------------------------------------------------------------------------------------------------------------------------------------------------------------------------------------------------------------------------------------------------------------------------------------------------------------------------------------------------------------------------------------------------------------------------------------------------------------------------------------------------|------------------------------------------------------------------------------------------------------------------------------------------------------------------------------------------------------------------------------------------------------------------------------------------------------------------------------------------------------------------------------------------------------------------------------------------------------------------------------------------------------------------------------------------|------------------------------------------------------------------------------------------------------------------------------------------------------------------------------------------------------------------------------------------------------------------------------------------------------------------------------------------------------------------------------------------------------------------------------------------------------------------------------------------------------------------------------------------|
| <input type="checkbox"/> Active surveillance, no evidence of disease following procedure<br><input type="checkbox"/> Active surveillance, disease present<br><input type="checkbox"/> Poor prognosis – supportive care, without Hospice<br><input type="checkbox"/> Poor prognosis – Hospice enrollment<br><input type="checkbox"/> Unable to afford treatment<br><input type="checkbox"/> Patient declined treatment<br><input type="checkbox"/> Local therapy (metastasectomy, etc)<br><input type="checkbox"/> Other (SPECIFY): _____ | <input type="checkbox"/> Active surveillance, no evidence of disease following procedure<br><input type="checkbox"/> Active surveillance, disease present<br><input type="checkbox"/> Poor prognosis – supportive care, without Hospice<br><input type="checkbox"/> Poor prognosis – Hospice enrollment<br><input type="checkbox"/> Unable to afford treatment<br><input type="checkbox"/> Patient declined treatment<br><input type="checkbox"/> Local therapy (metastasectomy, etc)<br><input type="checkbox"/> Other (SPECIFY): _____ | <input type="checkbox"/> Active surveillance, no evidence of disease following procedure<br><input type="checkbox"/> Active surveillance, disease present<br><input type="checkbox"/> Poor prognosis – supportive care, without Hospice<br><input type="checkbox"/> Poor prognosis – Hospice enrollment<br><input type="checkbox"/> Unable to afford treatment<br><input type="checkbox"/> Patient declined treatment<br><input type="checkbox"/> Local therapy (metastasectomy, etc)<br><input type="checkbox"/> Other (SPECIFY): _____ |

### SECTION B: NEW SYSTEMIC THERAPY SELECTED FOR THE PATIENT

Please select the **primary** reason and up to **two (2) secondary** reasons why you chose the mRCC agent for the patient. For combination therapies, please indicate reasons in relation to the combination as a whole.

| Primary Reason (SELECT ONE)                                                                                                                                                                                                                                                     | Secondary Reason (OPTIONAL)                                                                                                                                                                                                                                                     | Secondary Reason (OPTIONAL)                                                                                                                                                                                                                                                     |
|---------------------------------------------------------------------------------------------------------------------------------------------------------------------------------------------------------------------------------------------------------------------------------|---------------------------------------------------------------------------------------------------------------------------------------------------------------------------------------------------------------------------------------------------------------------------------|---------------------------------------------------------------------------------------------------------------------------------------------------------------------------------------------------------------------------------------------------------------------------------|
| <b>Patient Characteristics</b><br><input type="checkbox"/> Age<br><input type="checkbox"/> Performance status/frailty<br><input type="checkbox"/> Prognostic factors (MSKCC, Heng risk)<br><input type="checkbox"/> Comorbidities (SPECIFY): _____                              | <b>Patient Characteristics</b><br><input type="checkbox"/> Age<br><input type="checkbox"/> Performance status/frailty<br><input type="checkbox"/> Prognostic factors (MSKCC, Heng risk)<br><input type="checkbox"/> Comorbidities (SPECIFY): _____                              | <b>Patient Characteristics</b><br><input type="checkbox"/> Age<br><input type="checkbox"/> Performance status/frailty<br><input type="checkbox"/> Prognostic factors (MSKCC, Heng risk)<br><input type="checkbox"/> Comorbidities (SPECIFY): _____                              |
| <b>Likelihood of Clinical Benefit</b><br><input type="checkbox"/> Potential for Tumor regression<br><input type="checkbox"/> Overall survival/progression-free survival<br><input type="checkbox"/> Patient quality of life<br><input type="checkbox"/> Other (SPECIFY): _____  | <b>Likelihood of Clinical Benefit</b><br><input type="checkbox"/> Potential for Tumor regression<br><input type="checkbox"/> Overall survival/progression-free survival<br><input type="checkbox"/> Patient quality of life<br><input type="checkbox"/> Other (SPECIFY): _____  | <b>Likelihood of Clinical Benefit</b><br><input type="checkbox"/> Potential for Tumor regression<br><input type="checkbox"/> Overall survival/progression-free survival<br><input type="checkbox"/> Patient quality of life<br><input type="checkbox"/> Other (SPECIFY): _____  |
| <b>Side Effect Profile</b><br><input type="checkbox"/> Less Cardiac toxicities<br><input type="checkbox"/> Less GI toxicities<br><input type="checkbox"/> Less Fatigue<br><input type="checkbox"/> Less Metabolic toxicities<br><input type="checkbox"/> Other (SPECIFY): _____ | <b>Side Effect Profile</b><br><input type="checkbox"/> Less Cardiac toxicities<br><input type="checkbox"/> Less GI toxicities<br><input type="checkbox"/> Less Fatigue<br><input type="checkbox"/> Less Metabolic toxicities<br><input type="checkbox"/> Other (SPECIFY): _____ | <b>Side Effect Profile</b><br><input type="checkbox"/> Less Cardiac toxicities<br><input type="checkbox"/> Less GI toxicities<br><input type="checkbox"/> Less Fatigue<br><input type="checkbox"/> Less Metabolic toxicities<br><input type="checkbox"/> Other (SPECIFY): _____ |
| <b>Other</b><br><input type="checkbox"/> Patient preference<br><input type="checkbox"/> Cost<br><input type="checkbox"/> Other (SPECIFY): _____                                                                                                                                 | <b>Other</b><br><input type="checkbox"/> Patient preference<br><input type="checkbox"/> Cost<br><input type="checkbox"/> Other (SPECIFY): _____                                                                                                                                 | <b>Other</b><br><input type="checkbox"/> Patient preference<br><input type="checkbox"/> Cost<br><input type="checkbox"/> Other (SPECIFY): _____                                                                                                                                 |

Prescribing Physician Signature: \_\_\_\_\_ Date: \_\_\_\_\_

(b)

**PHYSICIAN TREATMENT SELECTION ASSESSMENT SURVEY  
DISCONTINUING SYSTEMIC THERAPY**

Site Number: \_\_\_\_\_ Provider Name: \_\_\_\_\_ Date of Visit: \_\_\_\_/\_\_\_\_/\_\_\_\_  
 8-digit Subject ID: \_\_\_\_\_ Subject Name: \_\_\_\_\_  
 Prescribed Therapy: \_\_\_\_\_

Please select the **PRIMARY REASON** for discontinuing the most immediate prior systemic therapy with the patient.

- Toxicity (GO TO C1)       Disease Progression (GO TO C2)       Other (GO TO C3)

**C1.** Please indicate the **PRIMARY** and **SECONDARY** toxicities and **1 ADDITIONAL (optional)** toxicity the patient experienced that led to your decision to remove the patient from systematic therapy.

| Primary Toxicity (SELECT ONE)                                                                                                                                                                                                                                                                                 | Secondary Toxicity (SELECT ONE)                                                                                                                                                                                                                       | Secondary Toxicity (OPTIONAL)                                                                                                                                                                                                                                                                                 |
|---------------------------------------------------------------------------------------------------------------------------------------------------------------------------------------------------------------------------------------------------------------------------------------------------------------|-------------------------------------------------------------------------------------------------------------------------------------------------------------------------------------------------------------------------------------------------------|---------------------------------------------------------------------------------------------------------------------------------------------------------------------------------------------------------------------------------------------------------------------------------------------------------------|
| <b>Constitutional</b><br><input type="checkbox"/> Fatigue/ Asthenia<br><input type="checkbox"/> Arthralgia                                                                                                                                                                                                    | <b>Constitutional</b><br><input type="checkbox"/> Fatigue/ Asthenia<br><input type="checkbox"/> Arthralgia                                                                                                                                            | <b>Constitutional</b><br><input type="checkbox"/> Fatigue/ Asthenia<br><input type="checkbox"/> Arthralgia                                                                                                                                                                                                    |
| <b>Gastrointestinal</b><br><input type="checkbox"/> Soreness in mouth/throat<br><input type="checkbox"/> Diarrhea<br><input type="checkbox"/> Nausea/vomiting<br><input type="checkbox"/> Abdominal pain<br><input type="checkbox"/> Loss of appetite                                                         | <b>Gastrointestinal</b><br><input type="checkbox"/> Soreness in mouth/throat<br><input type="checkbox"/> Diarrhea<br><input type="checkbox"/> Nausea/vomiting<br><input type="checkbox"/> Abdominal pain<br><input type="checkbox"/> Loss of appetite | <b>Gastrointestinal</b><br><input type="checkbox"/> Soreness in mouth/throat<br><input type="checkbox"/> Diarrhea<br><input type="checkbox"/> Nausea/vomiting<br><input type="checkbox"/> Abdominal pain<br><input type="checkbox"/> Loss of appetite                                                         |
| <b>Cardiovascular and Pulmonary</b><br><input type="checkbox"/> Hypertension<br><input type="checkbox"/> Cardiac dysfunction<br><input type="checkbox"/> Pneumonitis                                                                                                                                          | <b>Cardiovascular and Pulmonary</b><br><input type="checkbox"/> Hypertension<br><input type="checkbox"/> Cardiac dysfunction<br><input type="checkbox"/> Pneumonitis                                                                                  | <b>Cardiovascular and Pulmonary</b><br><input type="checkbox"/> Hypertension<br><input type="checkbox"/> Cardiac dysfunction<br><input type="checkbox"/> Pneumonitis                                                                                                                                          |
| <b>Dermatologic/Skin</b><br><input type="checkbox"/> Soreness in hands/feet<br><input type="checkbox"/> Rash                                                                                                                                                                                                  | <b>Dermatologic/Skin</b><br><input type="checkbox"/> Soreness in hands/feet<br><input type="checkbox"/> Rash                                                                                                                                          | <b>Dermatologic/Skin</b><br><input type="checkbox"/> Soreness in hands/feet<br><input type="checkbox"/> Rash                                                                                                                                                                                                  |
| <b>Hematologic and Laboratory</b><br><input type="checkbox"/> Hemorrhage<br><input type="checkbox"/> Anemia<br><input type="checkbox"/> Neutropenia<br><input type="checkbox"/> Thrombocytopenia<br><input type="checkbox"/> Increased AST, ALT or Bilirubin<br><input type="checkbox"/> Increased Creatinine | <b>Hematologic and Laboratory</b><br><input type="checkbox"/> Hemorrhage<br><input type="checkbox"/> Anemia<br><input type="checkbox"/> Neutropenia<br><input type="checkbox"/> Thrombocytopenia<br><input type="checkbox"/> Increased Creatinine     | <b>Hematologic and Laboratory</b><br><input type="checkbox"/> Hemorrhage<br><input type="checkbox"/> Anemia<br><input type="checkbox"/> Neutropenia<br><input type="checkbox"/> Thrombocytopenia<br><input type="checkbox"/> Increased AST, ALT or Bilirubin<br><input type="checkbox"/> Increased Creatinine |
| <b>Other (SPECIFY):</b><br>_____                                                                                                                                                                                                                                                                              | <input type="checkbox"/> None<br><input type="checkbox"/> <b>Other (SPECIFY):</b> _____                                                                                                                                                               | <input type="checkbox"/> <b>Other (SPECIFY):</b><br>_____                                                                                                                                                                                                                                                     |

**C2.** Please select the **PRIMARY** indicator(s) of **DISEASE PROGRESSION** that led to discontinuation of systemic treatment for the patient.

- New lesion(s) within already involved body organ (radiographic)  
 New lesion(s) in entirely new body organ (radiographic)  
 Growth of existing lesion(s) (radiographic)  
 Symptomatic, disease related (not treatment related toxicity)  
 Other (SPECIFY): \_\_\_\_\_

**C3.** Please select the other reason that led to discontinuation of systemic treatment for the patient.

- Patient declined ongoing treatment  
 Cost/ Unable to afford treatment  
 Other (SPECIFY): \_\_\_\_\_

Prescribing Physician Signature: \_\_\_\_\_ Date: \_\_\_\_\_

**Fig. S2** The duration of time on AS

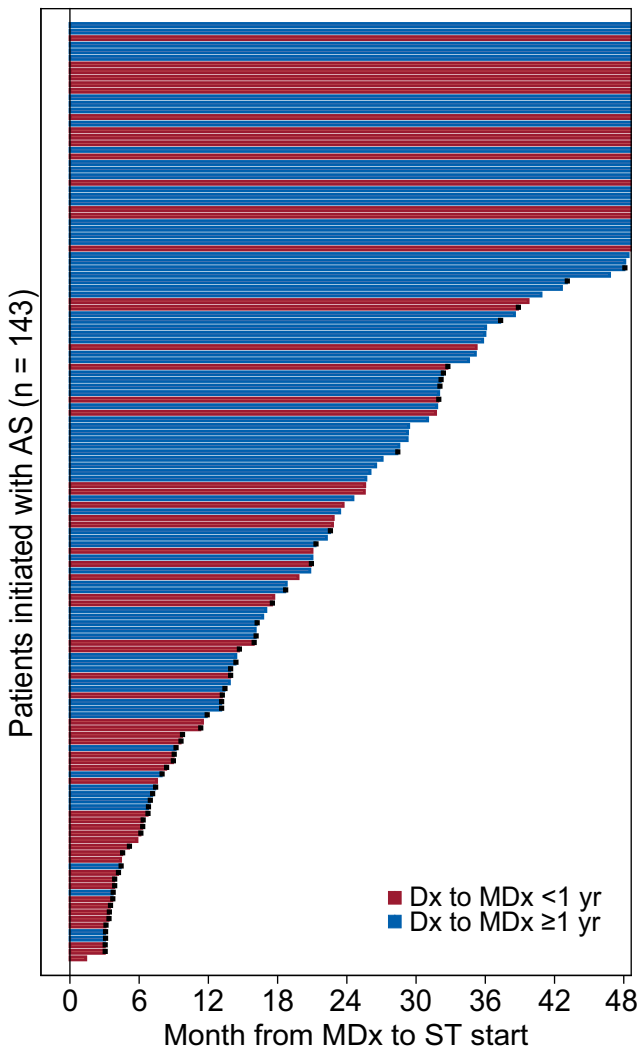

Footnote: AS, active surveillance; Dx, diagnosis; MDx, metastatic diagnosis; ST, systemic therapy. Each bar represents 1 patient. A square at the end of the bar indicates the patient initiated ST.

**Fig. S3** Kaplan-Meier curves for OS in disease present, no evidence of disease present, and ST cohorts

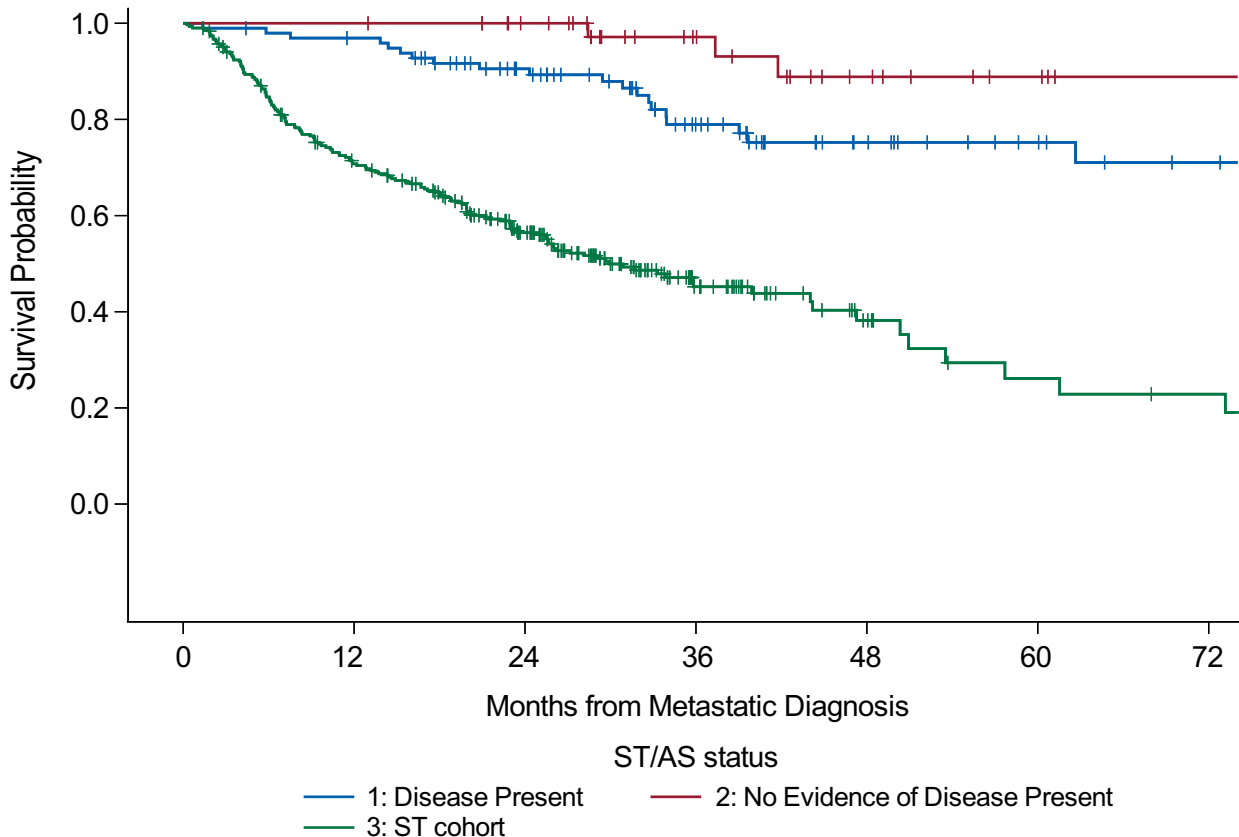

|   |     |     |     |    |    |    |    |
|---|-----|-----|-----|----|----|----|----|
| 1 | 98  | 93  | 73  | 47 | 28 | 20 | 15 |
| 2 | 45  | 45  | 39  | 25 | 16 | 11 | 8  |
| 3 | 304 | 206 | 132 | 46 | 17 | 8  | 6  |

Footnote: AS, active surveillance; OS, overall survival; ST, systemic therapy.
